# Supplementary figures and images for: Association between engagement in exercise training and peak cardiac biomarker concentrations following ST-elevation myocardial infarction
Source: HighWire-hosted journal article supplement (doi:10.1136/bmjsem-2022-001488), 2023-04-01

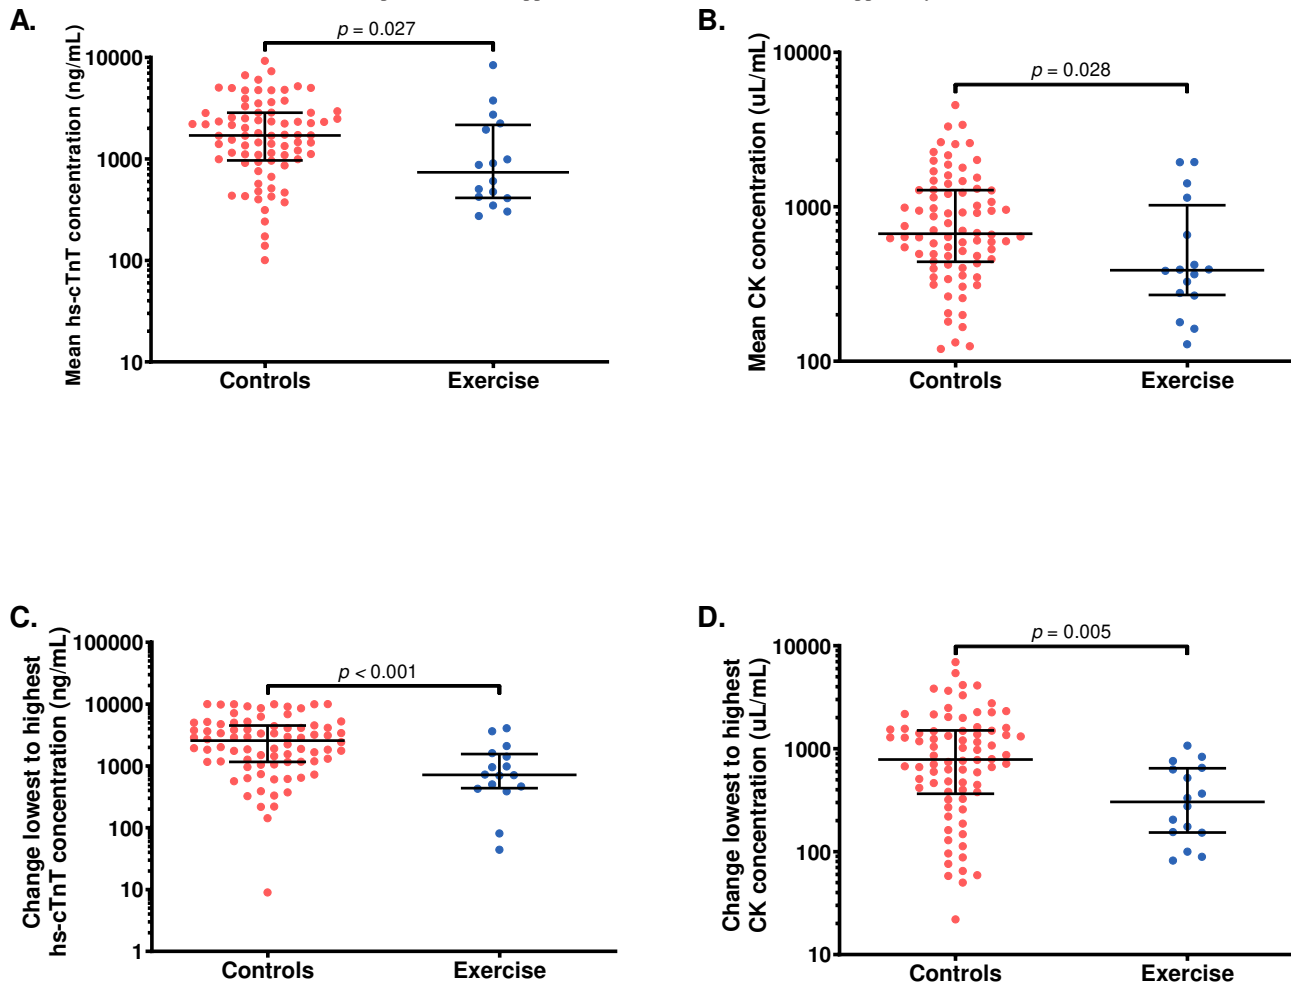

Supplement: bmjsem-2022-001488supp001_data_supplement.pdf [file bmjsem-2022-001488supp001_data_supplement.pdf]

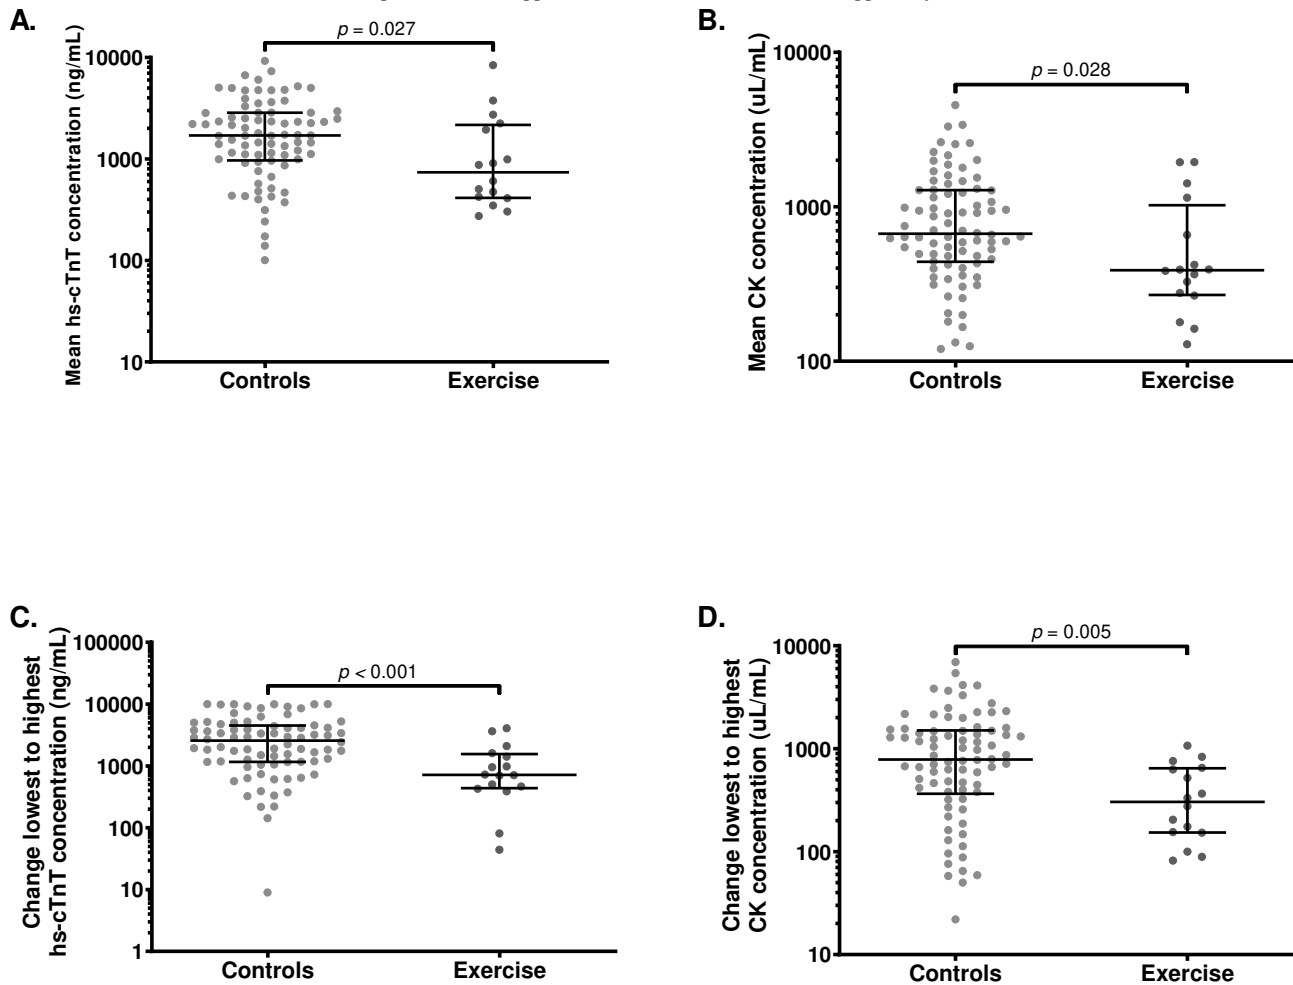

Supplement: bmjsem-2022-001488supp002_data_supplement.pdf [file bmjsem-2022-001488supp002_data_supplement.pdf]
